CORRECTION

# Correction: Psychometric evaluation of the Chinese version of the fear of intimacy with helping professionals scale

The *PLOS ONE* Staff

The affiliation and current address for the first author are swapped. Affiliation 1 should be: School of Health Sciences, Macao Polytechnic Institute, Macao Special Administration Region, China. The current address of Ying Lau should be: Department of Alice Lee Centre for Nursing Studies, Yong Loo Lin School of Medicine, National University of Singapore, Singapore. The publisher apologizes for the errors.

## Reference

1. Lau Y, Chan KS (2018) Psychometric evaluation of the Chinese version of the fear of intimacy with helping professionals scale. *PLoS ONE* 13(5): e0196774. <https://doi.org/10.1371/journal.pone.0196774> PMID: [29795563](https://pubmed.ncbi.nlm.nih.gov/29795563/)

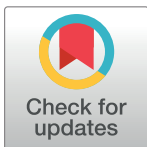

## OPEN ACCESS

**Citation:** The *PLOS ONE* Staff (2018) Correction: Psychometric evaluation of the Chinese version of the fear of intimacy with helping professionals scale. *PLoS ONE* 13(9): e0204440. <https://doi.org/10.1371/journal.pone.0204440>

**Published:** September 17, 2018

**Copyright:** © 2018 The PLOS ONE Staff. This is an open access article distributed under the terms of the [Creative Commons Attribution License](https://creativecommons.org/licenses/by/4.0/), which permits unrestricted use, distribution, and reproduction in any medium, provided the original author and source are credited.
